# Supplementary material
Source: PubMed Central journal article supplement (PMC3907211)

# **Mutations in the S6 Gate Isolate a Late Step in the Activation Pathway and Reduce 4-AP Sensitivity in *Shaker* K<sub>v</sub> Channel**

Evelyn Martinez-Morales, Dirk J. Snyders, and Alain J. Labro\*

Laboratory for Molecular Biophysics, Physiology and Pharmacology, University of Antwerp, Antwerp, Belgium

## Supporting Material

**Figure S1:** Voltage-dependence of activating gating charge movement (QV curves) of P475A. **A**, Scaled up view of the  $I_{Qdeac}$  recordings at -90 mV from the activation protocol shown in Figure 2B. The green, blue and red colored recordings were obtained upon depolarization to 0, +50 and +130 mV, respectively. Note the reduction in  $I_{Qdeac}$  amplitude upon stronger depolarizations, which indicates a slowing in the decay times of  $I_{Qdeac}$  due to BC gate opening. **B**, Red symbols and line (which represent average fit by a sum of two Boltzmann distributions) represent the QV curve of P475A obtained from integrating the  $I_{Qdeac}$  recordings of the activation protocol as shown in panel A. Integrating these  $I_{Qdeac}$  currents yielded a split QV curve, similar to the QV curve obtained from integrating the  $I_{Qac}$  recordings (blue symbols and line), with two components. The first carried  $87 \pm 3\%$  of the charges and displayed a  $V_{1/2}$  of  $-40.5 \pm 1.2$  mV with a slope factor of  $13.4 \pm 0.9$  mV ( $n = 6$ ). The second component carried the remaining 13% of charges and had a  $V_{1/2}$  of  $32.5 \pm 2.9$  mV with a slope factor of  $7.1 \pm 2.8$  mV. For comparison, the GV curve is represented in dotted lines. The reduction in charge at more depolarized potentials, noted in the QV curve obtained from the  $I_{Qdeac}$  recordings (red symbols), is due to the slowing in the decay time of  $I_{Qdeac}$ , which manifest itself by a reduction in  $I_{Qdeac}$  amplitude (panel A).

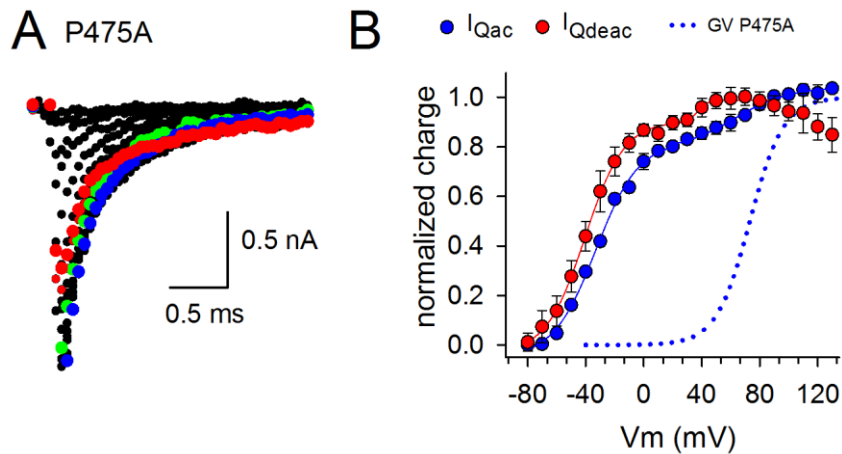

Supplement: mmc1.pdf [file mmc1.pdf]
